# Supplementary material for: Novel association of APC with intermediate filaments identified using a new versatile APC antibody
Source: PubMed Central journal article supplement (PMC2774295; doi:10.1186/1471-2121-10-75), 2009-10-21

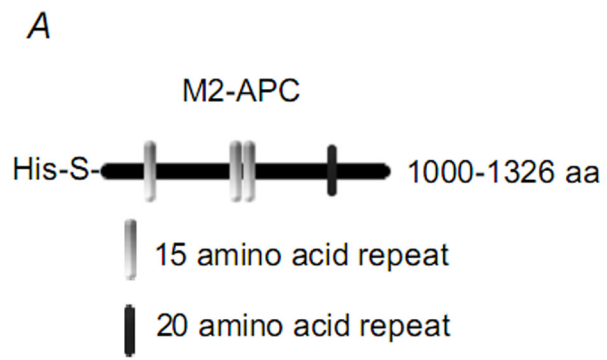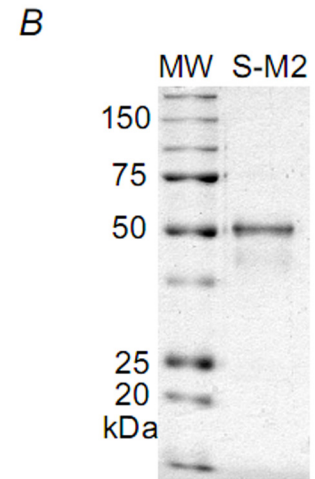

Supplement: 1471-2121-10-75-S1.pdf [file 1471-2121-10-75-S1.pdf]
