# Supplementary material for: Novel association of APC with intermediate filaments identified using a new versatile APC antibody
Source: PubMed Central journal article supplement (PMC2774295; doi:10.1186/1471-2121-10-75), 2009-10-21
Supplement: 1471-2121-10-75-S3.pdf [file 1471-2121-10-75-S3.pdf]

**Full list of proteins associated with APC as identified with LC-MS/MS**

| <b>Protein</b>                               | <b>Accession No.</b> | <b>Peptides found<br/>1<sup>st</sup> / 2<sup>nd</sup> run</b> | <b>Functional category</b> |
|----------------------------------------------|----------------------|---------------------------------------------------------------|----------------------------|
| Adenomatous polyposis coli                   | P25054               | 89/78                                                         | N/A                        |
| Lamin B1                                     | Q6DC98               | 7/6                                                           | Intermediate filament      |
| Lamin B2                                     | Q03252               | 2/3                                                           |                            |
| Keratin 81                                   | Q14533               | 5/5                                                           |                            |
| Keratin 82                                   | Q9NSB4               | 2/2                                                           |                            |
| $\alpha$ -actinin-4                          | 043707               | 4/3                                                           | Cytoskeletal regulation    |
| WD repeat protein 1                          | 075083               | 3/3                                                           |                            |
| Epiplakin                                    | P58107               | 3/2                                                           |                            |
| Protein phosphatase 1 regulatory subunit 12A | 014974               | 3/2                                                           |                            |
| Tubulin $\alpha$ -ubiquitous chain           | P68363               | 3/2                                                           |                            |
| Tubulin $\beta$ chain                        | P07437               | 3/2                                                           |                            |
| Tropomyosin-3                                | P06753               | 2/2                                                           |                            |
| Neurabin-2                                   | Q96SB3               | 2/2                                                           |                            |
| $\alpha$ -actinin-1                          | P12814               | 2/1                                                           |                            |
| $\beta$ -catenin                             | P35222               | 70/67                                                         |                            |
| RuvB-like 2                                  | Q9Y230               | 7/8                                                           |                            |
| RuvB-like 1                                  | Q9Y265               | 6/6                                                           |                            |
| RNA-binding protein 14                       | Q96PK6               | 6/7                                                           |                            |
| Ret finger protein isoform $\beta$ variant   | Q59EC6               | 4/2                                                           |                            |

|                                                                |        |     |                              |
|----------------------------------------------------------------|--------|-----|------------------------------|
| Heterogeneous nuclear ribonucleoprotein K                      | P61978 | 3/5 |                              |
| Pescadillo homolog 1                                           | 000541 | 2/2 |                              |
| Protein TFG                                                    | Q92734 | 8/6 | Chromosome rearrangement     |
| Ladinin 1                                                      | 000515 | 8/8 | Extracellular matrix         |
| 40S ribosomal protein S4, Y isoform 1                          | P22090 | 8/5 |                              |
| ATP-dependent RNA helicase DHX15                               | 043143 | 7/9 |                              |
| Splicing factor, arginine/serine-rich 1                        | Q07955 | 6/4 |                              |
| Heterogeneous nuclear ribonucleoprotein M                      | P52272 | 4/3 |                              |
| ATP-dependent RNA helicase DDX3X                               | 000571 | 4/2 |                              |
| Nucleolar RNA helicase 2                                       | Q9NR30 | 3/2 | RNA processing & translation |
| Splicing factor 3b, subunit 3                                  | Q6NTI8 | 2/3 |                              |
| Heterogeneous nuclear ribonucleoprotein Q                      | 060506 | 2/2 |                              |
| Nuclear fragile X mental retardation-<br>interacting protein 2 | Q7Z417 | 3/3 |                              |
| Transducin beta-like 3 variant                                 | Q59GD6 | 2/2 |                              |
| Heat shock 70 kDa protein 2                                    | P54652 | 7/6 | Chaperones                   |
| Heat shock 70kDa protein 5                                     | P11021 | 4/2 |                              |
| Liprin-β1                                                      | Q86W92 | 3/5 | Tumorigenesis                |
| LRCH3 precursor                                                | Q96II8 | 5/4 | Others                       |
| Transketolase                                                  | P29401 | 3/3 |                              |

(43 proteins; each peptide of which passed Xcorr cutoffs of 2 [+2 ion], 2.5 [+3 ion]; for all proteins at least 2 peptides found each duplicate run)
